# Supplementary material
Source: Springer Nature journal article supplement (https://www.springermedizin.de/resource/supplementary/12958_2003_93_MOESM1_ESM.pdf/9566386)

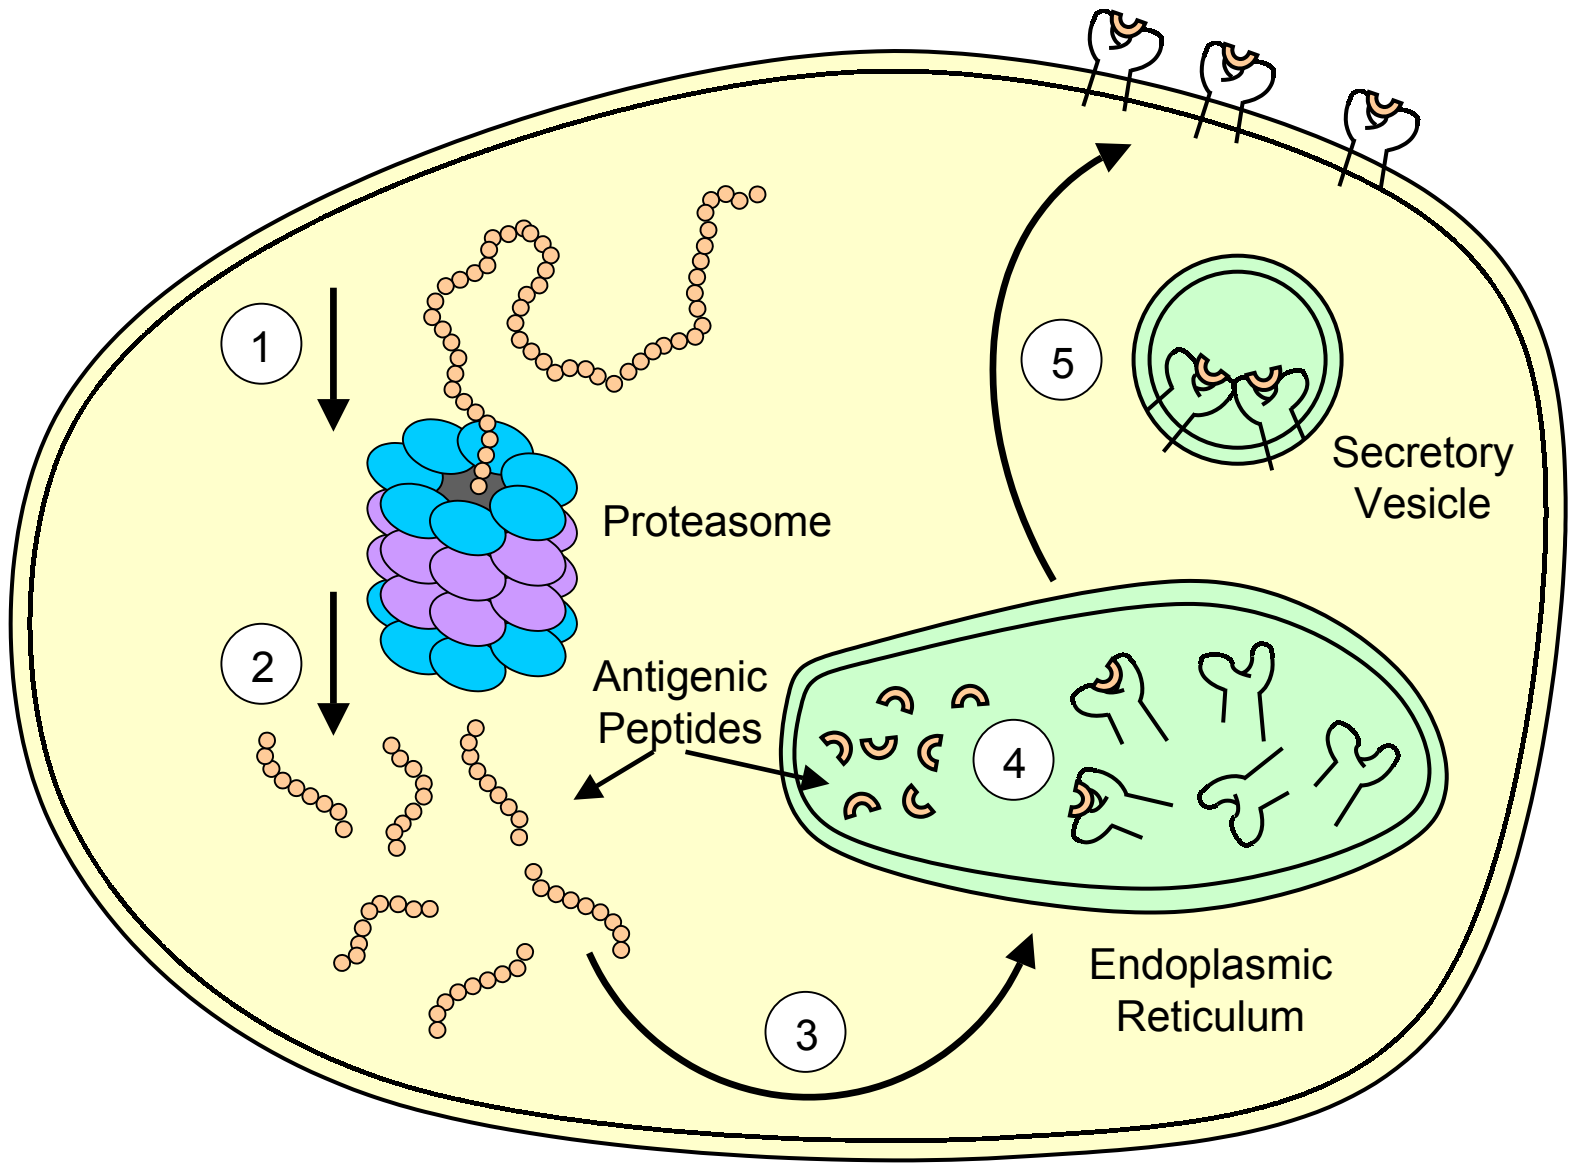

Supplement: MOESM1 [file 9566386]
